# Supplementary material for: CCAAT/Enhancer-Binding Protein Homologous (CHOP) Protein Promotes Carcinogenesis in the DEN-Induced Hepatocellular Carcinoma Model
Source: PubMed Central journal article supplement (PMC3855209; doi:10.1371/journal.pone.0081065), 2013-12-05
Supplement: pone.0081065.s001.pdf [file pone.0081065.s001.pdf]

Table S1. List of antibodies

| Antibody Name   | Method   | Company & Catalogue number         |
|-----------------|----------|------------------------------------|
| ATF6            | WB & IHC | Abcam (#11909)                     |
| BiP             | WB       | Abcam (#21685)                     |
| CHOP            | WB       | Cell Signaling (#L63F7)            |
| eIF2 $\alpha$   | WB       | Cell Signaling (#9721)             |
| p eIF2 $\alpha$ | WB       | Cell Signaling (#9722)             |
| F4/80           | IHC      | AbD Serotec (#mca497r)             |
| GADD153         | IHC      | Santa-Cruz Biotechnology (#sc-575) |
| Ki67            | IHC      | Thermo Scientific (94-RM-9106)     |
| IRE             | WB       | Cell Signaling (#3294)             |
| pIRE            | WB       | Abcam, Cambridge, UK, (#48187)     |
| PERK            | WB       | Cell Signaling (#3192)             |
| pPERK           | WB       | Cell Signaling (#3179)             |

Table S2. Primers list for qPCR

| Gene | Primer Forward        | Primer Reverse         |
|------|-----------------------|------------------------|
| atf4 | ccttcgaccagtcgggtt    | ctgtcccggaaaaggcat     |
| ccl3 | actgcctgctgcttctctaca | aggaaaatgacacctggctgg  |
| ccl4 | ttcctgctgttctcttacacc | ctgtctgcctcttttgg      |
| ccl5 | agatctctgcagctgcctca  | ggagcacttgctgctggtgtag |
| chop | ctggaagcctggtatgag    | cagggtcaagagtagtga     |

|                     |                          |                           |
|---------------------|--------------------------|---------------------------|
| erdj4               | ataaaagcctgatgctg        | gccattggtaaaagcact        |
| ifn $\gamma$        | atgaacgctacacactgcatc    | ccatcctttgccagttcctc      |
| il-6                | tctataccacttcacaagtcgga  | gaattgccattgcacaactctt    |
| p58ipk              | tttactgccgaagacta        | ctggggttagattgagc         |
| tnfa                | ggcaggtctactttggagtcattg | acattcgaggctccagtgaattcgg |
| xbp1 (spliced form) | gagtcgcgacgaggtg         | gtgtcagagtccatggga        |
| xbp1 (total)        | aagaacacgcttgggaatgg     | actccccttggcctccac        |
| ubc                 | cagccgtatatcttcccagact   | ctcagagggatgccagtaatcta   |

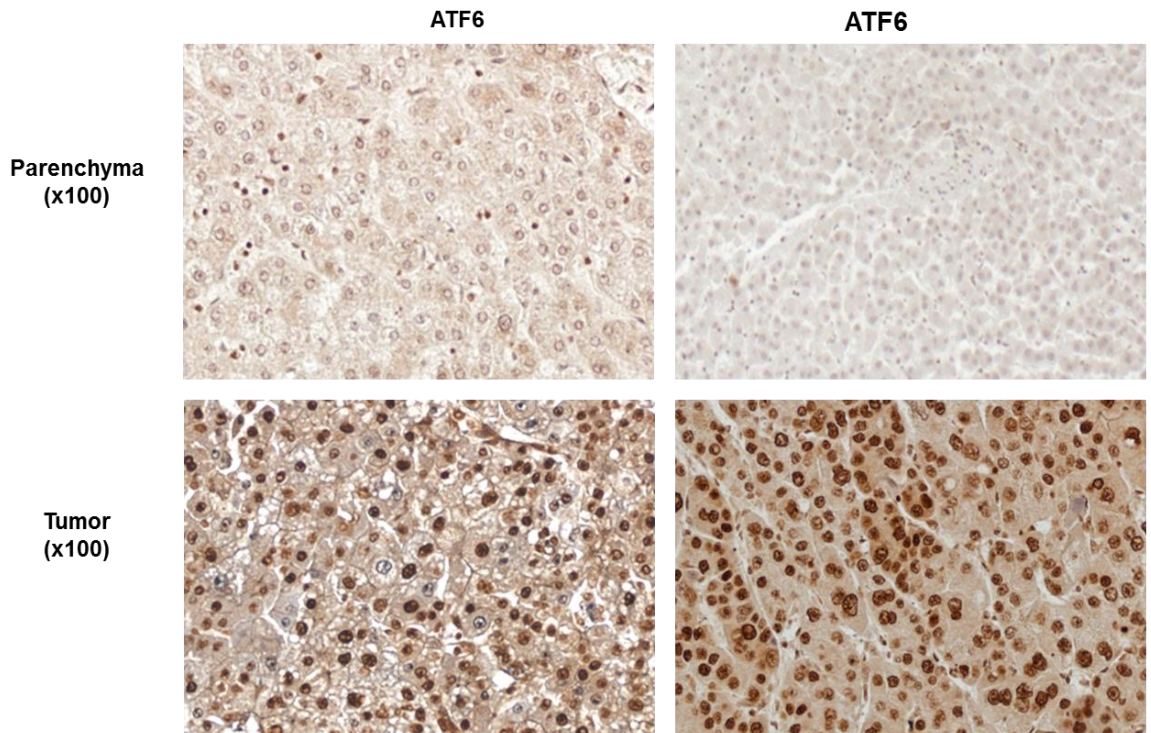

**Figure S1. ATF6 is activated in human HCC.** Representative samples from liver tumor resected from patients, stained for ATF6.

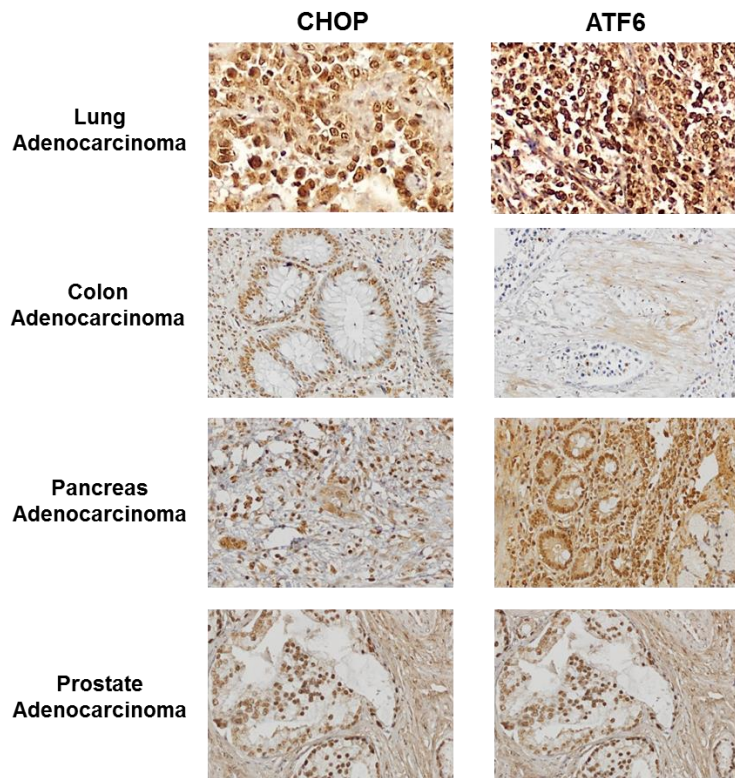

**Figure S2. CHOP and ATF6 are activated in different human adenocarcinomas.** Representative samples from lung, colon, pancreas and prostate adenocarcinomas show activation of CHOP (left) and ATF6 (right).
